# Supplementary material
Source: MDPI journal article supplement (https://www.mdpi.com/2571-6255/4/3/37)
Supplement: s1 [file s1 › fire-1302888-supplementary.pdf]

## Survey Questions S1

### Survey Title: Prescribed Fire in Northern California Survey

Q1 What is your email address?

---

Q2 What type of entity do you primarily work for with regard to prescribed fire?

- ☐ US Forest Service
- ☐ Bureau of Land Management
- ☐ American Indian Tribe
- ☐ CAL FIRE
- ☐ National Park Service
- ☐ California State Parks
- ☐ Non-governmental organization
- ☐ Private company
- ☐ Other (please specify) \_\_\_\_\_

Q3 Which park, forest district, field office, or unit do you work for to conduct/plan prescribed burns?

---

---

Q4 What is your position?

---

---

Q5 Within your position, how do you support prescribed burning?

---

---

Q6 What were your agency/organization's annual prescribed burn area targets in 2018 (if known)?

- ☐ 0 - 25 acres
  - ☐ 26 - 100 acres
  - ☐ 101 - 500 acres
  - ☐ 501 - 999 acres
  - ☐ 1000 + acres
- 

Q7 How many total acres did your agency/organization burn in 2018?

- ☐ 0 - 25 acres
  - ☐ 26 - 100 acres
  - ☐ 101 - 500 acres
  - ☐ 501 - 999 acres
  - ☐ 1000 + acres
- 

Q8 Since 2013, has your agency/organization made progress toward increasing the overall area of prescribed burns?

- ☐ Yes
  - ☐ No
-

Q9 Please estimate how many more acres your agency/organization burns annually compared to 2013:

- ☐ 1 - 10 acres
- ☐ 11 - 51 acres
- ☐ 51 - 100 acres
- ☐ Other (please specify) \_\_\_\_\_
- 

Q10 Since 2013, what were the most important actions your agency/organization took to increase prescribed burning (1 being most important)?

- ☐ 1 \_\_\_\_\_
- ☐ 2 \_\_\_\_\_
- ☐ 3 \_\_\_\_\_
- 

Q11 Of the following prescribed burn objectives, which does your agency/organization regularly accomplish, and which are more difficult to accomplish?

|                                                                        | Regularly Accomplish  | Difficult to accomplish | N/A                   |
|------------------------------------------------------------------------|-----------------------|-------------------------|-----------------------|
| Fuel reduction                                                         | <input type="radio"/> | <input type="radio"/>   | <input type="radio"/> |
| Enhancement of Nontimber (special) forest products                     | <input type="radio"/> | <input type="radio"/>   | <input type="radio"/> |
| Enhancement of ecocultural resources (e.g. acorns, basketry materials) | <input type="radio"/> | <input type="radio"/>   | <input type="radio"/> |
| Forage enhancement for deer/elk/livestock                              | <input type="radio"/> | <input type="radio"/>   | <input type="radio"/> |
| Ecological restoration                                                 | <input type="radio"/> | <input type="radio"/>   | <input type="radio"/> |
| Other (if applicable, please specify)                                  | <input type="radio"/> | <input type="radio"/>   | <input type="radio"/> |

---

Q12 Have interagency and community-based collaborations supported prescribed burning efforts within your agency/organization?

- ☐ A great deal
  - ☐ A lot
  - ☐ A moderate amount
  - ☐ A little
  - ☐ N/A
- 

Q13 How have these collaborations specifically supported prescribed burning?

**Select all that apply**

- ☐ Provided funding
  - ☐ Provided personnel and equipment
  - ☐ Provided training
  - ☐ Supported with burn planning and permitting
  - ☐ Supported with community outreach
  - ☐ Other (please specify) \_\_\_\_\_
-

Q14 Has your agency/organization participated in collaborative burning supported by any of the following programs?

**Select all that apply**

- ☐ Prescribed Fire Training Exchanges (TREX)
- ☐ Joint Chiefs Landscape Restoration Partnership
- ☐ CAL FIRE funds or programs (e.g., Vegetation Management Program, Forest Health grants)
- ☐ California Department of Fish and Wildlife funds
- ☐ California Fire Safe Council funds
- ☐ Tribal Forest Protection Act
- ☐ Other (Please specify) \_\_\_\_\_
- ☐ N/A

---

Q15 How many times has your agency/organization participated in prescribed fire training exchanges (TREX)?

- ☐ 1 - 2 times
  - ☐ 3 - 4 times
  - ☐ 5 - 6 times
  - ☐ 7 + times
-

Q16 Was TREX useful for your agency/organization?

- ☐ Very useful
- ☐ Moderately useful
- ☐ Slightly useful
- ☐ Not useful

---

Q17 What are the specific benefits of TREX for your agency/organization?

---

Q18 If your agency/organization had unlimited financial resources, which of the following would be your top three impediments to prescribed burning? **(Drag items and drop in the box)**

Top three impediments without financial constraints

- \_\_\_\_\_ Coordination of multiple property owners
  - \_\_\_\_\_ Air quality permitting
  - \_\_\_\_\_ NEPA/CEQA processes
  - \_\_\_\_\_ Permissive legal burn days
  - \_\_\_\_\_ Public concerns
- \_\_\_\_\_ Wildfires reducing available personnel
  - \_\_\_\_\_ Short burn windows
  - \_\_\_\_\_ Other (please specify)

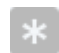

Q19 If your agency/organization could allocate more financial resources to expand annual prescribed burn area, which would be the top three budget items you would increase? **(Drag items and drop in the box)**

Top three items to increase financial resources

- \_\_\_\_\_ Personnel to plan burns
- \_\_\_\_\_ Personnel to implement burns
- \_\_\_\_\_ Personnel to prep burn units
- \_\_\_\_\_ Personnel training

\_\_\_\_\_ Equipment (e.g., engines, hose, etc.)

\_\_\_\_\_ Insurance policies

\_\_\_\_\_ Other (please specify)

---

Q20 Which of the following do you believe constrains your agency/organization's burn window?  
Please rank the pertinent choices, with the first item being the greatest contributor.

Greatest constraints to burn window

\_\_\_\_\_ Unavailable personnel

\_\_\_\_\_ Wildfires reducing available personnel

\_\_\_\_\_ Climate changes (e.g., drought, unpredictable precipitation)

\_\_\_\_\_ Permissive burn days

\_\_\_\_\_ Limited financial resources

\_\_\_\_\_ Limited collaborative management with other agencies

\_\_\_\_\_ Risk aversion

\_\_\_\_\_ Other (please specify)

---

Q21 Do you believe the legal burn window (permissive burn days) has become shorter since 2013?

☐ Yes

☐ Maybe

☐ No

Q22 How often do the following landscape features discourage your agency/organization from planning prescribed burns nearby?

|                                   | Most of the time      | Occasionally          | Rarely                | Never                 |
|-----------------------------------|-----------------------|-----------------------|-----------------------|-----------------------|
| Private properties and structures | <input type="radio"/> | <input type="radio"/> | <input type="radio"/> | <input type="radio"/> |
| Cultural resources                | <input type="radio"/> | <input type="radio"/> | <input type="radio"/> | <input type="radio"/> |
| Endangered species                | <input type="radio"/> | <input type="radio"/> | <input type="radio"/> | <input type="radio"/> |
| High fuel load areas              | <input type="radio"/> | <input type="radio"/> | <input type="radio"/> | <input type="radio"/> |
| Recreation attractions            | <input type="radio"/> | <input type="radio"/> | <input type="radio"/> | <input type="radio"/> |
| Other (please specify)            | <input type="radio"/> | <input type="radio"/> | <input type="radio"/> | <input type="radio"/> |

Q23 Does your agency/organization have sufficient resources to reduce fuel loads to prepare sites for prescribed fire?

- ☐ Always
- ☐ Most of the time
- ☐ Occasionally
- ☐ Rarely
- ☐ Never

Q24 Please explain how the Endangered Species Act has caused your agency/organization to limit prescribed burning plans:

---

Q25 Do planning procedures like CEQA or NEPA impede your agency/organization's ability to implement and increase prescribed burns?

- ☐ Always
  - ☐ Most of the time
  - ☐ Occasionally
  - ☐ Rarely
  - ☐ Never
  - ☐ N/A
- 

Q26 Does your agency/organization have sufficient specialists available to efficiently conduct CEQA and NEPA assessments of proposed prescribed burns?

- ☐ Always
  - ☐ Most of the time
  - ☐ Occasionally
  - ☐ Rarely
  - ☐ Never
  - ☐ N/A
- 

Q27 If your agency/organization could add staff to streamline the completion of CEQA or NEPA requirements for prescribed burning, which would be the top three positions? **(Drag items and drop in the box)**

Top 3 Staffing Positions to Streamline CEQA/NEPA

|                                    |
|------------------------------------|
| _____ Cultural Resource Specialist |
| _____ Wildlife biologist           |
| _____ Forester                     |
| _____ Botanist                     |
| _____ Environmental Planner        |

\_\_\_\_\_ Other (please specify)

---

Q28 Is your agency/organization limited by the availability of burn bosses to conduct prescribed burns?

- ☐ Always
- ☐ Most of the time
- ☐ Occasionally
- ☐ Rarely
- ☐ Never
- 

Q29 Has the lack of available wildland fire crews or modules limited your agency/organization 's ability to conduct prescribed burns?

- ☐ Always
- ☐ Most of the time
- ☐ Occasionally
- ☐ Rarely
- ☐ Never
- 

Q30 If your agency/organization could increase personnel to expand prescribed burning capacity, which type of personnel would be most beneficial? (Please rank, 1 being the greatest, 5 being the least)

- \_\_\_\_\_ Burn bosses
- \_\_\_\_\_ Fire managers
- \_\_\_\_\_ Wildland fire crews/modules
- \_\_\_\_\_ Scientists/Specialists
- \_\_\_\_\_ Cultural Resource Technicians
-

Q31 Since 2013 has your agency/organization been able to make improvements to the following prescribed fire impediments?

|                             | Improved              | Unchanged             | Declined              |
|-----------------------------|-----------------------|-----------------------|-----------------------|
| Air quality permitting      | <input type="radio"/> | <input type="radio"/> | <input type="radio"/> |
| NEPA/CEQA assessments       | <input type="radio"/> | <input type="radio"/> | <input type="radio"/> |
| Personnel resources         | <input type="radio"/> | <input type="radio"/> | <input type="radio"/> |
| Public concerns             | <input type="radio"/> | <input type="radio"/> | <input type="radio"/> |
| Financial resources         | <input type="radio"/> | <input type="radio"/> | <input type="radio"/> |
| Fuel loading                | <input type="radio"/> | <input type="radio"/> | <input type="radio"/> |
| Property owner coordination | <input type="radio"/> | <input type="radio"/> | <input type="radio"/> |

Q32 What specific actions has your agency/organization taken to overcome or reduce the following impediments to prescribed burning?

- ☐ Air quality permitting \_\_\_\_\_
- ☐ NEPA/CEQA assessments \_\_\_\_\_
- ☐ Personnel resources \_\_\_\_\_
- ☐ Public concerns \_\_\_\_\_
- ☐ Financial resources \_\_\_\_\_
- ☐ Fuel loading \_\_\_\_\_
- ☐ Property owner coordination \_\_\_\_\_
- ☐ Other (please specify) \_\_\_\_\_

---

Q33 Has your agency/organization attempted to reduce impediments with limited effectiveness?

☐ Yes

☐ No

☐ N/A

---

Q34 What were those efforts and why weren't they effective?

---

Q35 Are there changes to specific laws and policies that you believe would support the expansion of prescribed burning?

---

Q36 Are there any promising developments that you believe will aid in expanding prescribed burning in the next decade?

---

Q37 Thank you for participating in this survey!

Do you have anything else you would like to add?

---
